# Supplementary material for: Hierarchically mesostructured MIL-101 metal–organic frameworks: supramolecular template-directed synthesis and accelerated adsorption kinetics for dye removal
Source: Royal Society of Chemistry journal article supplement (doi:10.1039/c1ce06138k), 2011-12-16
Supplement: c1ce06138k.pdf [file c1ce06138k.pdf]

## Electronic Supplementary Information for

# Hierarchically mesostructured metal-organic framework MIL-101: Supramolecular template-directed synthesis and accelerated adsorption 5 kinetics for dye removal

Xiao-Xian Huang,<sup>a</sup> Ling-Guang Qiu,<sup>\*a</sup> Wang Zhang,<sup>a</sup> Yu-Peng Yuan,<sup>a</sup> Xia Jiang,<sup>a</sup> An-Jian Xie,<sup>a</sup> Yu-Hua Shen,<sup>a</sup> and Jun-Fa Zhu<sup>b</sup>

<sup>a</sup> Laboratory of Advanced Porous Materials, and School of Chemistry and Chemical Engineering, Anhui University, Hefei, 230039,  
10 China. Fax: +86 551 5108212; Tel: +86 551-5108212; E-mail: lgqiu@ahu.edu.cn

<sup>b</sup> National Synchrotron Radiation Laboratory, University of Science and Technology of China, Hefei, 230029, China.

15

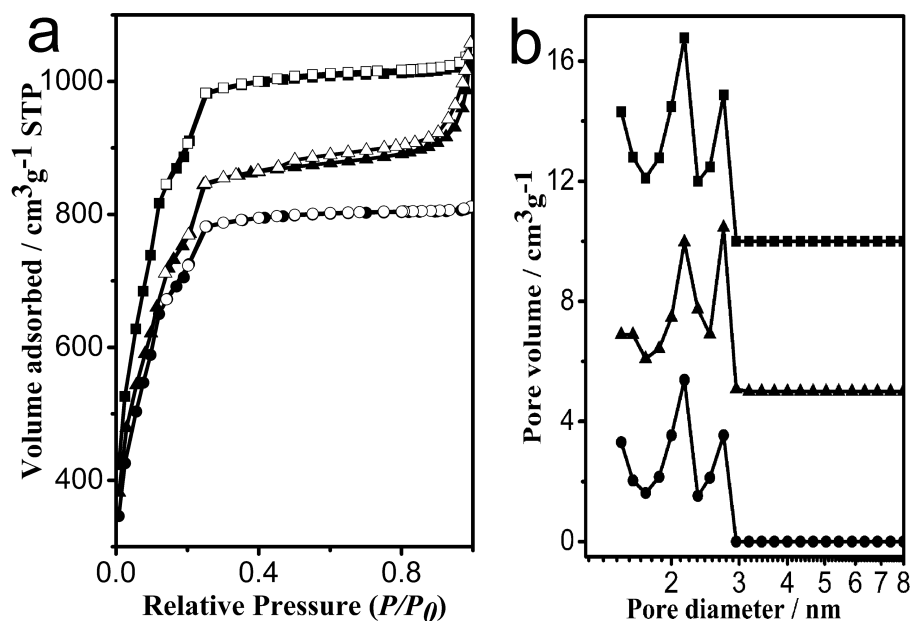

20

**Fig. S1.** (a) N<sub>2</sub> adsorption-desorption isotherms at 77K for the hierarchically mesostructured MIL-101 A1(■), A2 (▲), and A3(●); (b) Distribution of pore diameters obtained using the Density-Function-Theory (DFT) method, the distributions for A1, and A2 are vertically offset by 10, and 5 cm<sup>3</sup> g<sup>-1</sup>, respectively.

25

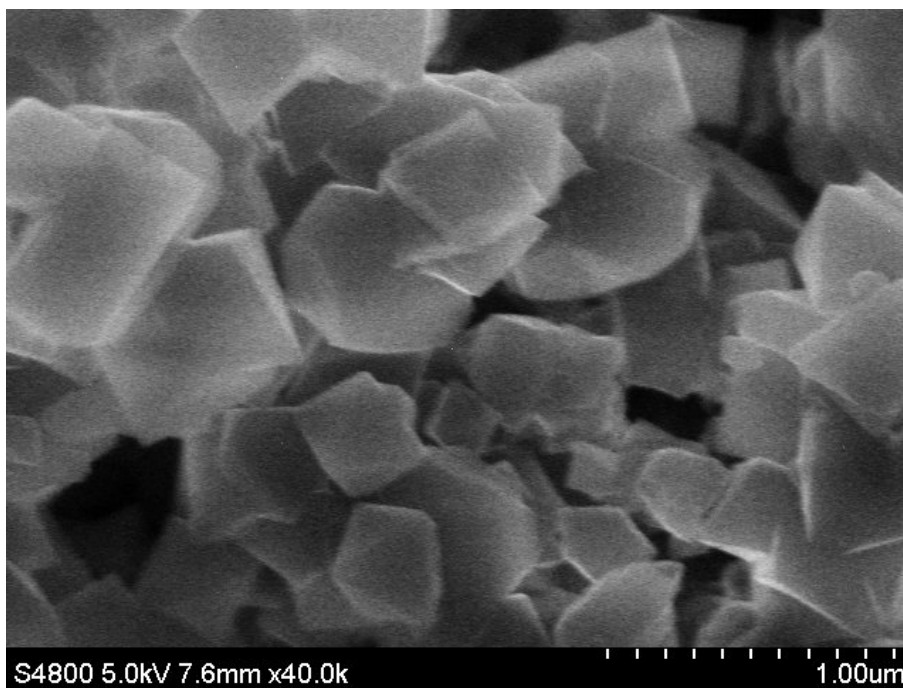

**Fig. S2.** SEM images of MIL-101 sample **A2** synthesized at CTAB/Cr<sup>3+</sup> molar ratio of 0.15.

5

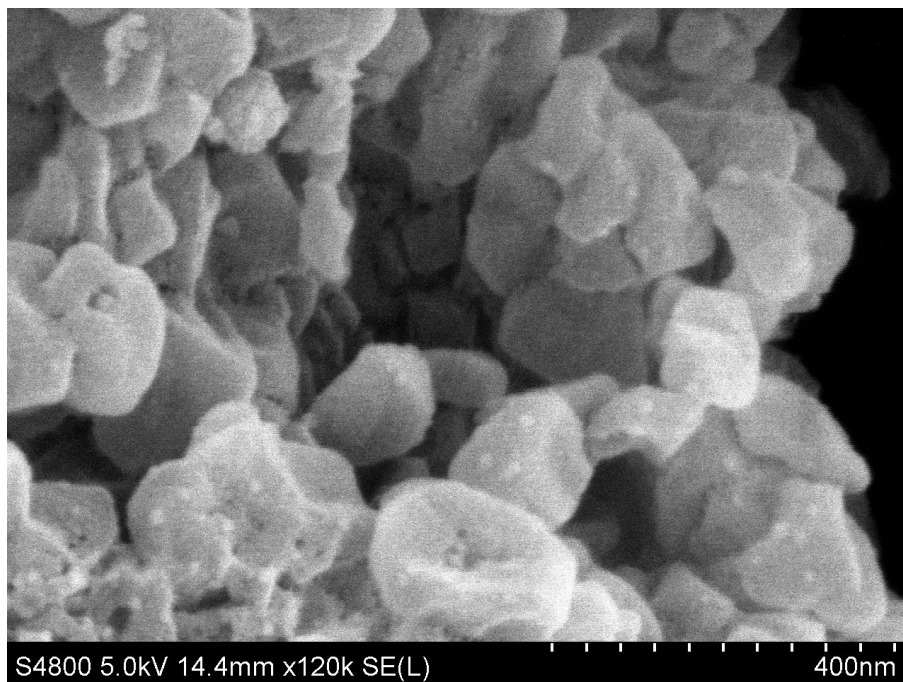

**Fig. S3.** SEM images of MIL-101 **A3** synthesized at CTAB/Cr<sup>3+</sup> molar ratios of 0.2.

10
